# Supplementary material for: Clinical patient registry recruitment and retention: a survey of patients in two chronic disease registries
Source: BMC Med Res Methodol. 2017 Apr 17;17:59. doi: 10.1186/s12874-017-0343-3 (PMC5392954; doi:10.1186/s12874-017-0343-3)
Supplement: Supplementary file 1 — These files contain the surveys used to conduct the research described in the manuscript. (ZIP 388 kb) [file 12874_2017_343_MOESM1_ESM.zip]

Archive with 2 entries (2 files):
- Survey.BRASS.final.solomonR3.pdf
- Survey.BrITR.final.solomonR3.pdf
