# Supplementary material for: Clinical patient registry recruitment and retention: a survey of patients in two chronic disease registries
Source: BMC Med Res Methodol. 2017 Apr 17;17:59. doi: 10.1186/s12874-017-0343-3 (PMC5392954; doi:10.1186/s12874-017-0343-3)
Supplement: Supplementary file 1 — These files contain the surveys used to conduct the research described in the manuscript. (ZIP 388 kb) [file 12874_2017_343_MOESM1_ESM.zip › Survey.BRASS.final.solomonR3.pdf]

**This survey is designed to collect information related to how you feel about participating in a research registry like BRASS. Please answer each question to the best of your ability.**

- 1) What motivated you to participate in BRASS? **Rank** the top 3, marking the most important with the number 1, the second most important with the number 2, and the third most important with the number 3.
- ☐ My doctor convinced me
  - ☐ A family member or friend convinced me
  - ☐ My desire to help others
  - ☐ I hoped it would help me take better care of my RA
  - ☐ It was easy to volunteer
  - ☐ I like the gifts (pens, magnets, parking, etc.)
  - ☐ The research assistants are nice
  - ☐ Other: \_\_\_\_\_
- 2) What would increase your willingness to stay involved or become more involved in BRASS? **Rank** the top 3, marking the most important with the number 1, the second most important with the number 2, and the third most important with the number 3.
- ☐ Continue offering free parking
  - ☐ Fewer questionnaires
  - ☐ Getting paid to answer surveys
  - ☐ Getting feedback from the registry on my survey answers
  - ☐ Getting more general information from the registry about RA
  - ☐ Having educational presentations from the registry doctors about RA
  - ☐ Having a chance to talk with other patients in the registry
  - ☐ Less blood work
  - ☐ Less x-rays
  - ☐ Less in-person study visits
  - ☐ Being able to schedule separate appointment for BRASS
  - ☐ I will stay enrolled and answer all questionnaires no matter what

**The next few questions will ask you specifically about BRASS surveys and questionnaires.**

- 3) What would be your preferred method of filling out surveys? **Rank** the top 3, marking the most preferred with the number 1, the second most preferred with the number 2, and the third most preferred with the number 3.
- ☐ Paper survey at home that I mail back
  - ☐ Paper survey at home that I can bring to the clinic
  - ☐ Paper survey at the clinic
  - ☐ Tablet/computer survey at the clinic
  - ☐ Phone survey
  - ☐ Email survey (secure and encrypted)
  - ☐ Survey on the internet/web (secure and encrypted)
  - ☐ Survey on a smart phone application (secure and encrypted)
  - ☐ Other: \_\_\_\_\_

- 4) At most, how often would you be willing to respond to mailed BRASS surveys? Pick **one** answer.
- ☐ Every 1-3 months
  - ☐ Every 4-6 months
  - ☐ Every 7-12 months
  - ☐ Every 13-24 months
- 5) Would you consider answering BRASS surveys more often if they were shorter? For example, if BRASS wanted you to report on specific RA symptoms, like pain and swelling, with a 1-2 minute checklist. Would you consider answering such questions, and how often? Pick **one** answer.
- ☐ Would not answer
  - ☐ Yes, about every 1 week
  - ☐ Yes, about every 2 weeks
  - ☐ Yes, about every 1 month
  - ☐ Yes, about every 2 months
- 6) If BRASS offered to pay participants to answer surveys what would be a motivating payment for you? Pick **one** answer.
- ☐ No payment necessary
  - ☐ \$10
  - ☐ \$20
  - ☐ \$25
- 7) What topics should BRASS ask you about on surveys? **Rank** the top 5, marking the most important with the number 1, the second most important with the number 2, and so on until you get to the number 5.
- \_\_\_ Medications for RA
  - \_\_\_ Medications, other than for RA
  - \_\_\_ Emotional health
  - \_\_\_ Coping strategies (such as meditation or physical activity)
  - \_\_\_ RA disease activity
  - \_\_\_ RA disease complications (such as heart problems or nerve damage)
  - \_\_\_ Economic effects of RA
  - \_\_\_ Diet and nutrition
  - \_\_\_ Alternative therapy (such as supplements and health food preparations)
  - \_\_\_ Other medical conditions
  - \_\_\_ Other: \_\_\_\_\_
- 8) Is there anything about the current BRASS surveys that you think should be changed? Check **all** that apply.
- ☐ Make it shorter
  - ☐ Make it longer
  - ☐ Larger size text (larger font)
  - ☐ Put more space between the questions (text is too crowded)
  - ☐ Put all answer choices going down the page instead of across (vertically instead of horizontally)
  - ☐ I would not change anything
  - ☐ Other: \_\_\_\_\_

9) If you have ever left questions blank on a BRASS survey, what were your reasons for doing so? Check **all** that apply.

- ☐ Question is too personal in nature
- ☐ I did not understand the question
- ☐ I did not think it applied to me
- ☐ None of the given choices matched my answer
- ☐ I did not know or could not remember the answer
- ☐ Question did not apply to my RA, but to different health issue
- ☐ Ran out of steam (survey too long)
- ☐ I do not leave questions blank
- ☐ Other: \_\_\_\_\_

**The next few questions will ask you specifically about BRASS in-person study visits (not mailed surveys).**

10) At most, how often would you be willing to complete an in-person BRASS study visit? Pick **one** answer.

- ☐ Every 3 months
- ☐ Every 6 months
- ☐ Every 12 months
- ☐ Every 18 months

11) What is the maximum length of time you would be willing to spend at an in-person BRASS study visit? Pick **one** answer.

- ☐ No more than 15 minutes
- ☐ No more than 30 minutes
- ☐ No more than 45 minutes
- ☐ No more than 1 hour

12) If BRASS offered to pay participants to complete in-person study visits, what would be a motivating payment for you? Pick **one** answer.

- ☐ No payment necessary
- ☐ \$10
- ☐ \$20
- ☐ >\$30

13) When would it be convenient for you to complete an in-person BRASS study visit? **Rank** the top 3, marking the most convenient with the number 1, the second most convenient with the number 2, and the third most convenient with the number 3.

- \_\_\_ At my regularly scheduled rheumatology appointment
- \_\_\_ At any appointment I have scheduled in the main hospital (75 Francis Street)
- \_\_\_ At any appointment I have scheduled in any location (such as 850 Boylston St. or Foxborough)
- \_\_\_ Set up a separate time to come in to the hospital for a research study visit
- \_\_\_ Other \_\_\_\_\_

**14)** What would be your preferred method of contact from study staff regarding your survey answers or study visits? **Rank** the top 3, marking the most preferred with the number 1, the second most preferred with the number 2, and the third most preferred with the number 3.

\_\_\_ Mail

\_\_\_ Phone

\_\_\_ Email

\_\_\_ Text message

\_\_\_ Do not contact me with questions about my survey answers or study visits

**15)** Please check the statement that is most accurate regarding the number of research studies you are asked to participate in. Pick **one** answer.

☐ The number of research studies I am asked to participate in is appropriate

☐ The number of research studies I am asked to participate in is too few

☐ The number of research studies I am asked to participate in is too many

**Thank you for completing this survey!**
